# Supplementary material
Source: PubMed Central journal article supplement (PMC8361458)
Supplement: advancesADV2021004770-suppl1.pdf [file advancesADV2021004770-suppl1.pdf]

## Supplementary Material

### Supplementary Tables

**Supplementary Table 1.** Available and analyzed biomarker data

| Cohort                | Time to event data | Biomarker data           | BCL2 by IHC |
|-----------------------|--------------------|--------------------------|-------------|
| Arthur <sup>30</sup>  | PFS, OS            | RNA-Seq, IHC, NanoString | Yes         |
| Reddy <sup>32</sup>   | OS                 | RNA-Seq                  | Yes         |
| Schmitz <sup>31</sup> | PFS, OS            | RNA-Seq                  | No          |
| GOYA <sup>21</sup>    | PFS, OS            | RNA-Seq, IHC, PCR        | Yes         |

IHC, immunohistochemistry; OS, overall survival; PCR, polymerase chain reaction; PFS, progression-free survival; RNA-Seq, RNA sequencing.

**Supplementary Table 2.** Association between PFS and increased *FCGR2B* expression (RNA-Seq) in the Arthur and Schmitz DLBCL cohorts and according to COO. Cox regression results based on *FCGR2B* expression represented as continuous variable.

|                                          | Cohort  | Total n | Hazard ratio | 95% CI    | P-value |
|------------------------------------------|---------|---------|--------------|-----------|---------|
| <i>Univariate analysis</i>               |         |         |              |           |         |
| All cases                                | Arthur  | 372     | 1.09         | 1.01-1.19 | .0360   |
| All cases                                | Schmitz | 229     | 1.13         | 1.02-1.26 | .0243   |
| <i>Multivariate analysis<sup>a</sup></i> |         |         |              |           |         |
| All cases                                | Arthur  | 322     | 1.12         | 1.02-1.23 | .0209   |
| All cases                                | Schmitz | 188     | 1.15         | 1.01-1.31 | .0335   |
| <i>Univariate analysis</i>               |         |         |              |           |         |
| COO                                      |         |         |              |           |         |
| GCB                                      | Arthur  | 204     | 1.14         | 1.03-1.26 | .0150   |
| GCB                                      | Schmitz | 108     | 1.04         | 0.87-1.23 | .68     |
| ABC                                      | Arthur  | 120     | 1.09         | 0.91-1.31 | .36     |
| ABC                                      | Schmitz | 79      | 1.14         | 0.91-1.43 | .25     |

<sup>a</sup>Includes adjustment for International Prognostic Index, COO and BCL2 protein expression.

ABC, activated B cell; CI, confidence interval; COO, cell of origin; DLBCL, diffuse large B-cell lymphoma; GCB, germinal center B cell; RNA-Seq, RNA sequencing.

**Supplementary Table 3.** Association between OS and increased *FCGR2B* expression levels (RNA-Seq) in the Arthur, Schmitz and Reddy DLBCL cohorts and according to COO. Cox regression results based on *FCGR2B* expression represented as continuous variable.

|                                          | Cohort  | Total n | Hazard ratio | 95% CI    | P-value |
|------------------------------------------|---------|---------|--------------|-----------|---------|
| <i>Univariate analysis</i>               |         |         |              |           |         |
| All cases                                | Arthur  | 372     | 1.07         | 0.98-1.17 | .13     |
| All cases                                | Schmitz | 234     | 1.07         | 0.96-1.20 | .22     |
| All cases                                | Reddy   | 454     | 1.21         | 1.04-1.42 | .0167   |
| <i>Multivariate analysis<sup>a</sup></i> |         |         |              |           |         |
| All cases                                | Arthur  | 346     | 1.08         | 0.98-1.18 | .11     |
| All cases                                | Schmitz | 189     | 1.06         | 0.93-1.22 | .38     |
| All cases                                | Reddy   | 387     | 1.10         | 0.92-1.32 | .29     |
| <i>Univariate analysis</i>               |         |         |              |           |         |
| COO                                      |         |         |              |           |         |
| GCB                                      | Arthur  | 204     | 1.10         | 0.98-1.22 | .11     |
| GCB                                      | Schmitz | 110     | 1.00         | 0.84-1.20 | .96     |
| GCB                                      | Reddy   | 196     | 1.19         | 0.96-1.47 | .11     |
| ABC                                      | Arthur  | 120     | 1.09         | 0.90-1.33 | .38     |
| ABC                                      | Schmitz | 82      | 1.02         | 0.80-1.30 | .87     |
| ABC                                      | Reddy   | 187     | 1.06         | 0.80-1.41 | .68     |

<sup>a</sup>Includes adjustment for International Prognostic Index, COO and BCL2 protein expression.

ABC, activated B cell; CI, confidence interval; COO, cell of origin; DLBCL, diffuse large B-cell lymphoma; GCB, germinal center B cell; OS, overall survival; RNA-Seq, RNA sequencing.

**Supplementary Table 4.** Association between PFS/OS and increased *FCGR2B* expression (NanoString) in the Arthur DLBCL cohort. Cox regression results based on *FCGR2B* expression represented as continuous variable.

|                                              | Total n | Hazard ratio | 95% CI    | P-value |
|----------------------------------------------|---------|--------------|-----------|---------|
| <i>PFS Univariate analysis</i>               |         |              |           |         |
| All cases                                    | 325     | 1.13         | 1.04-1.23 | .0048   |
| <i>PFS Multivariate analysis<sup>a</sup></i> |         |              |           |         |
| All cases                                    | 288     | 1.13         | 1.02-1.24 | .0140   |
| <i>OS Univariate analysis</i>                |         |              |           |         |
| All cases                                    | 325     | 1.09         | 1.00-1.20 | .0621   |
| <i>OS Multivariate analysis<sup>a</sup></i>  |         |              |           |         |
| All cases                                    | 288     | 1.09         | 0.99-1.21 | .0745   |

<sup>a</sup>Includes adjustment for International Prognostic Index, cell of origin and BCL2 protein expression.

CI, confidence interval; DLBCL, diffuse large B-cell lymphoma; OS, overall survival; PFS, progression-free survival.

**Supplementary Table 5.** Association between PFS and FcγRIIB protein expression by IHC on DLBCL tumors in the Arthur cohort

|           | FcγRIIB by IHC           | Total n | Hazard ratio | 95% CI    | <i>P</i> -value |
|-----------|--------------------------|---------|--------------|-----------|-----------------|
| All cases | Low (vs negative)        | 331     | 0.97         | 0.69-1.36 | .86             |
| All cases | High (vs negative)       | 331     | 1.53         | 0.97-2.39 | .0644           |
| All cases | High (vs negative + low) | 331     | 1.56         | 1.05-2.31 | .0270           |
| By COO    |                          |         |              |           |                 |
| GCB       | High (vs negative + low) | 172     | 1.95         | 1.17-3.27 | .0110           |
| ABC       | High (vs negative + low) | 98      | 1.32         | 0.65-2.66 | .44             |

ABC, activated B cell; CI, confidence interval; COO, cell of origin; DLBCL, diffuse large B-cell lymphoma; FcγRIIB, Fc gamma receptor IIB; GCB, germinal center B cell; IHC, immunohistochemistry; PFS, progression-free survival.

**Supplementary Table 6.** Association between OS and FcγRIIB protein expression by IHC on DLBCL tumors in the Arthur cohort

|           | FcγRIIB by IHC           | Total n | Hazard ratio | 95% CI    | <i>P</i> -value |
|-----------|--------------------------|---------|--------------|-----------|-----------------|
| All cases | Low (vs negative)        | 331     | 0.99         | 0.69-1.41 | .93             |
| All cases | High (vs negative)       | 331     | 1.40         | 0.87-2.24 | .16             |
| All cases | High (vs negative + low) | 331     | 1.41         | 0.93-2.14 | .10             |
| By COO    |                          |         |              |           |                 |
| GCB       | High (vs negative + low) | 172     | 1.73         | 1.00-2.99 | .0482           |
| ABC       | High (vs negative + low) | 98      | 1.40         | 0.69-2.86 | .35             |

ABC, activated B cell; CI, confidence interval; COO, cell of origin; DLBCL, diffuse large B-cell lymphoma; FcγRIIB, Fc gamma receptor IIB; GCB, germinal center B cell; IHC, immunohistochemistry; OS, overall survival.

**Supplementary Table 7.** Demographic and baseline characteristics of patients with DLBCL in the GOYA cohort according to treatment group (BEP)

| Characteristic <sup>a</sup> n (%) | BEP RNA-Seq<br>R-CHOP (n = 271) | BEP RNA-Seq<br>G-CHOP (n = 281) |
|-----------------------------------|---------------------------------|---------------------------------|
| Age                               |                                 |                                 |
| Median, years (range)             | 63 (18-83)                      | 63 (18-85)                      |
| Female, n (%)                     | 124 (45.8)                      | 140 (49.8)                      |
| Number of chemotherapy cycles     |                                 |                                 |
| 6                                 | 208 (76.8)                      | 194 (69.0)                      |
| 8                                 | 63 (23.2)                       | 87 (31.0)                       |
| Geographic region                 |                                 |                                 |
| Asia                              | 45 (16.6)                       | 44 (15.7)                       |
| Eastern Europe                    | 52 (19.2)                       | 70 (24.9)                       |
| Western Europe                    | 108 (39.9)                      | 108 (38.4)                      |
| North America                     | 50 (18.5)                       | 43 (15.3)                       |
| Other                             | 16 (5.9)                        | 16 (5.7)                        |
| IPI                               |                                 |                                 |
| Low                               | 53 (19.6)                       | 54 (19.2)                       |
| Low-intermediate                  | 96 (35.4)                       | 98 (34.9)                       |
| High-intermediate                 | 82 (30.3)                       | 79 (28.1)                       |
| High                              | 40 (14.8)                       | 50 (17.8)                       |
| Ann Arbor stage at diagnosis      |                                 |                                 |
| I/II                              | 64 (23.6)                       | 70 (24.9)                       |
| III/IV                            | 207 (76.4)                      | 211 (75.1)                      |
| COO, n                            | 265                             | 273                             |
| GCB                               | 154 (58.1)                      | 144 (52.7)                      |
| ABC                               | 71 (26.8)                       | 80 (29.3)                       |
| Unclassified                      | 40 (15.1)                       | 49 (18.0)                       |
| DHITsig, n                        | 154                             | 144                             |
| Positive                          | 21 (13.6)                       | 11 (7.6)                        |
| Negative                          | 133 (83.4)                      | 133 (92.4)                      |
| BCL2 by IHC, n                    | 210                             | 223                             |
| Positive                          | 103 (49.0)                      | 103 (46.2)                      |
| Negative                          | 107 (51.0)                      | 120 (53.8)                      |

<sup>a</sup>All data are n (%) unless otherwise stated.

ABC, activated B cell; BEP, biomarker-evaluable population; COO, cell of origin; DLBCL, diffuse large B-cell lymphoma; GCB, germinal center B cell; G-CHOP, obinutuzumab plus cyclophosphamide, doxorubicin, vincristine and prednisone; IHC, immunohistochemistry; IPI, International Prognostic Index; R-CHOP, rituximab plus cyclophosphamide, doxorubicin, vincristine and prednisone.

**Supplementary Table 8.** Association between PFS and increased *FCGR2B* expression (RNA-Seq) in the GOYA DLBCL cohort by treatment. Cox regression results based on *FCGR2B* expression represented as continuous variable.

|                                          | Treatment | Total n | Hazard ratio | 95% CI    | <i>P</i> -value |
|------------------------------------------|-----------|---------|--------------|-----------|-----------------|
| <i>Univariate analysis</i>               |           |         |              |           |                 |
| All cases                                | R-CHOP    | 271     | 1.26         | 1.00-1.58 | .0455           |
| All cases                                | G-CHOP    | 281     | 0.91         | 0.69-1.20 | .50             |
| <i>Multivariate analysis<sup>a</sup></i> |           |         |              |           |                 |
| All cases                                | R-CHOP    | 206     | 1.32         | 0.98-1.79 | .0695           |
| All cases                                | G-CHOP    | 220     | 0.92         | 0.68-1.24 | .58             |
| Univariate analysis                      |           |         |              |           |                 |
| COO                                      |           |         |              |           |                 |
| GCB                                      | R-CHOP    | 154     | 1.22         | 0.92-1.63 | .16             |
| GCB                                      | G-CHOP    | 144     | 0.89         | 0.61-1.32 | .57             |
| ABC                                      | R-CHOP    | 71      | 1.35         | 0.74-2.46 | .33             |
| ABC                                      | G-CHOP    | 80      | 1.12         | 0.60-2.09 | .72             |

<sup>a</sup>Includes adjustment for International Prognostic Index, COO and BCL2 protein expression.

ABC, activated B cell; CI, confidence interval; COO, cell of origin; DLBCL, diffuse large B-cell lymphoma; GCB, germinal center B cell; G-CHOP, obinutuzumab plus cyclophosphamide, doxorubicin, vincristine and prednisone; PFS, progression-free survival; R-CHOP, rituximab plus cyclophosphamide, doxorubicin, vincristine and prednisone; RNA-Seq, RNA sequencing.

**Supplementary Table 9.** Treatment effect (G-CHOP vs R-CHOP) on PFS within the low and high *FCGR2B* expression (RNA-Seq) in the GOYA DLBCL cohort

|                                          | Treatment        | Total n | Subgroup n | Hazard ratio | 95% CI    | P-value |
|------------------------------------------|------------------|---------|------------|--------------|-----------|---------|
| <i>Univariate analysis</i>               |                  |         |            |              |           |         |
| <i>FCGR2B</i> expression                 |                  |         |            |              |           |         |
| ≤median (low)                            | G-CHOP vs R-CHOP | 276     | 147 vs 129 | 1.58         | 1.00-2.50 | .0503   |
| >median (high)                           | G-CHOP vs R-CHOP | 276     | 134 vs 142 | 0.67         | 0.44-1.02 | .0622   |
| Treatment:biomarker interaction          |                  |         |            |              |           | .0064   |
| <i>Multivariate analysis<sup>a</sup></i> |                  |         |            |              |           |         |
| <i>FCGR2B</i> expression                 |                  |         |            |              |           |         |
| ≤median (low)                            | G-CHOP vs R-CHOP | 213     | 117 vs 96  | 1.87         | 1.10-3.18 | .0216   |
| >median (high)                           | G-CHOP vs R-CHOP | 213     | 103 vs 110 | 0.80         | 0.49-1.32 | .39     |
| Treatment:biomarker interaction          |                  |         |            |              |           | .0249   |

<sup>a</sup>Includes adjustment for International Prognostic Index, cell of origin and BCL2 protein expression.

CI, confidence interval; DLBCL, diffuse large B-cell lymphoma; G-CHOP, obinutuzumab plus cyclophosphamide, doxorubicin, vincristine and prednisone; IHC, immunohistochemistry; PFS, progression-free survival; R-CHOP, rituximab plus cyclophosphamide, doxorubicin, vincristine and prednisone; RNA-Seq, RNA sequencing.

**Supplementary Table 10.** Association between OS and increased *FCGR2B* expression (RNA-Seq) in the GOYA DLBCL cohort by treatment. Cox regression results based on *FCGR2B* expression represented as continuous variable.

|                                          | Treatment | Total n | Hazard ratio | 95% CI    | P-value |
|------------------------------------------|-----------|---------|--------------|-----------|---------|
| <i>Univariate analysis</i>               |           |         |              |           |         |
| All cases                                | R-CHOP    | 271     | 1.25         | 0.93-1.67 | .14     |
| All cases                                | G-CHOP    | 281     | 0.86         | 0.61-1.21 | .39     |
| <i>Multivariate analysis<sup>a</sup></i> |           |         |              |           |         |
| All cases                                | R-CHOP    | 206     | 1.32         | 0.88-1.95 | .18     |
| All cases                                | G-CHOP    | 220     | 0.78         | 0.53-1.15 | .21     |
| Univariate analysis                      |           |         |              |           |         |
| COO                                      |           |         |              |           |         |
| GCB                                      | R-CHOP    | 154     | 1.22         | 0.84-1.76 | .30     |
| GCB                                      | G-CHOP    | 144     | 0.81         | 0.48-1.35 | .42     |
| ABC                                      | R-CHOP    | 71      | 1.32         | 0.62-2.79 | .47     |
| ABC                                      | G-CHOP    | 80      | 0.96         | 0.50-1.84 | .91     |

<sup>a</sup>Includes adjustment for International Prognostic Index, COO and BCL2 protein expression.

ABC, activated B cell; CI, confidence interval; COO, cell of origin; DLBCL, diffuse large B-cell lymphoma; G-CHOP, obinutuzumab plus cyclophosphamide, doxorubicin, vincristine and prednisone; IHC, immunohistochemistry; GCB, germinal center B cell; OS, overall survival; R-CHOP, rituximab plus cyclophosphamide, doxorubicin, vincristine and prednisone; RNA-Seq, RNA sequencing.

**Supplementary Table 11.** Association between PFS and FcγRIIB protein expression by IHC on tumors and macrophages in the GOYA DLBCL cohort by treatment

|                                             | Treatment | Total n | Subgroup n | Hazard ratio | 95% CI     | P-value |
|---------------------------------------------|-----------|---------|------------|--------------|------------|---------|
| <i>Univariate analysis</i>                  |           |         |            |              |            |         |
| FcγRIIB expression on tumor (status)        |           |         |            |              |            |         |
| Positive vs negative                        | R-CHOP    | 127     | 26 vs 101  | 2.17         | 1.04-4.50  | .0378   |
| Positive vs negative                        | G-CHOP    | 324     | 24 vs 110  | 1.37         | 0.66-2.87  | .40     |
| FcγRIIB expression on macrophages (grouped) |           |         |            |              |            |         |
| High vs negative + low                      | R-CHOP    | 121     | 107 vs 14  | 1.39         | 0.42-4.57  | .59     |
| High vs negative + low                      | G-CHOP    | 128     | 109 vs 19  | 0.44         | 0.22-0.91  | .0258   |
| <i>Multivariate analysis</i>                |           |         |            |              |            |         |
| FcγRIIB expression on tumor (status)        |           |         |            |              |            |         |
| Positive vs negative                        | R-CHOP    | 116     | 25 vs 91   | 3.05         | 1.14-8.16  | .0264   |
| Positive vs negative                        | G-CHOP    | 123     | 21 vs 102  | 1.51         | 0.67-3.41  | .32     |
| FcγRIIB expression on macrophages (grouped) |           |         |            |              |            |         |
| High vs negative + low                      | R-CHOP    | 110     | 100 vs 10  | 2.56         | 0.32-20.39 | .37     |
| High vs negative + low                      | G-CHOP    | 117     | 102 vs 15  | 0.39         | 0.18-0.88  | .0227   |

<sup>a</sup>Includes adjustment for International Prognostic Index, cell of origin and BCL2 protein expression.

CI, confidence interval; DLBCL, diffuse large B-cell lymphoma; FcγRIIB, Fc gamma receptor IIB; G-CHOP, obinutuzumab plus cyclophosphamide, doxorubicin, vincristine and prednisone; IHC, immunohistochemistry; PFS, progression-free survival; R-CHOP, rituximab plus cyclophosphamide, doxorubicin, vincristine and prednisone.

**Supplementary Table 12.** Treatment effect (G-CHOP vs R-CHOP) on PFS within the low and high

FcγRIIB protein expression by IHC on tumors and macrophages in the GOYA DLBCL cohort

|                                             | Treatment        | Total<br>n | Subgroup n | Hazard ratio | 95% CI      | P-value |
|---------------------------------------------|------------------|------------|------------|--------------|-------------|---------|
| <i>Univariate analysis</i>                  |                  |            |            |              |             |         |
| FcγRIIB expression on tumor (status)        |                  |            |            |              |             |         |
| Negative                                    | G-CHOP vs R-CHOP | 211        | 110 vs 101 | 1.42         | 0.82-2.46   | .21     |
| Positive                                    | G-CHOP vs R-CHOP | 50         | 24 vs 26   | 0.88         | 0.37-2.13   | .78     |
| FcγRIIB expression on macrophages (grouped) |                  |            |            |              |             |         |
| Negative + low                              | G-CHOP vs R-CHOP | 33         | 19 vs 14   | 3.16         | 0.86-11.53  | .08     |
| High                                        | G-CHOP vs R-CHOP | 216        | 109 vs 107 | 0.96         | 0.57-1.59   | .86     |
| <i>Multivariate analysis<sup>a</sup></i>    |                  |            |            |              |             |         |
| FcγRIIB expression on tumor (status)        |                  |            |            |              |             |         |
| Negative                                    | G-CHOP vs R-CHOP | 193        | 102 vs 91  | 1.66         | 0.90-3.08   | .11     |
| Positive                                    | G-CHOP vs R-CHOP | 46         | 21 vs 25   | 0.80         | 0.26-2.44   | .70     |
| FcγRIIB expression on macrophages (grouped) |                  |            |            |              |             |         |
| Negative + low                              | G-CHOP vs R-CHOP | 25         | 15 vs 10   | 10.01        | 0.89-112.16 | .06     |
| High                                        | G-CHOP vs R-CHOP | 202        | 102 vs 100 | 0.95         | 0.55-1.64   | .87     |

<sup>a</sup>Includes adjustment for International Prognostic Index, cell of origin and BCL2 protein expression.

CI, confidence interval; DLBCL, diffuse large B-cell lymphoma; FcγRIIB, Fc gamma receptor IIB; G-CHOP,

obinutuzumab plus cyclophosphamide, doxorubicin, vincristine and prednisone; IHC, immunohistochemistry;

PFS, progression-free survival; R-CHOP, rituximab plus cyclophosphamide, doxorubicin, vincristine and prednisone.

**Supplementary Table 13.** Association between OS and FcγRIIB protein expression by IHC on tumors and macrophages in the GOYA DLBCL cohort by treatment

|                                             | Treatment | Total n | Subgroup n | Hazard ratio | 95% CI    | P-value |
|---------------------------------------------|-----------|---------|------------|--------------|-----------|---------|
| <i>Univariate analysis</i>                  |           |         |            |              |           |         |
| FcγRIIB expression on tumor (status)        |           |         |            |              |           |         |
| Positive vs negative                        | R-CHOP    | 127     | 26 vs 101  | 1.61         | 0.66-3.93 | .29     |
| Positive vs negative                        | G-CHOP    | 324     | 24 vs 110  | 1.86         | 0.82-4.21 | .13     |
| FcγRIIB expression on macrophages (grouped) |           |         |            |              |           |         |
| High vs negative + low                      | R-CHOP    | 121     | 107 vs 14  | 1.39         | 0.33-5.95 | .65     |
| High vs negative + low                      | G-CHOP    | 128     | 109 vs 19  | 0.42         | 0.18-1.00 | .0506   |
| <i>Multiivariate analysis</i>               |           |         |            |              |           |         |
| FcγRIIB expression on tumor (status)        |           |         |            |              |           |         |
| Positive vs negative                        | R-CHOP    | 116     | 25 vs 91   | 1.89         | 0.57-6.31 | .30     |
| Positive vs negative                        | G-CHOP    | 123     | 21 vs 102  | 2.05         | 0.84-5.01 | .12     |
| FcγRIIB expression on macrophages (grouped) |           |         |            |              |           |         |
| High vs negative + low                      | R-CHOP    | 110     | 100 vs 10  | >100         | NA        | 1.00    |
| High vs negative + low                      | G-CHOP    | 117     | 102 vs 15  | 0.31         | 0.12-0.80 | .0159   |

<sup>a</sup>Includes adjustment for International Prognostic Index, cell of origin and BCL2 protein expression.

CI, confidence interval; DLBCL, diffuse large B-cell lymphoma; FcγRIIB, Fc gamma receptor IIB; G-CHOP,

obinutuzumab plus cyclophosphamide, doxorubicin, vincristine and prednisone; IHC, immunohistochemistry;

NA, not available; OS, overall survival; R-CHOP, rituximab plus cyclophosphamide, doxorubicin, vincristine and prednisone.

## Supplementary Figures

**Supplementary Figure 1.** Detailed evaluation of the association between PFS and *FCGR2B* expression by RNA-Seq in patients treated with R-CHOP in the Arthur and the Schmitz cohort. Kaplan–Meier curves for PFS based on *FCGR2B* expression according to stratification by quartiles and the corresponding p-values from the log-rank test (A, B). Evaluation of the robustness of the stratification threshold used to dichotomize samples into low and high *FCGR2B* expression subgroups. Various thresholds were used, the corresponding HR between low and high *FCGR2B* expression subgroups and the corresponding 95% CIs from the univariate (C, D), and multivariate (E, F) Cox regression are plotted

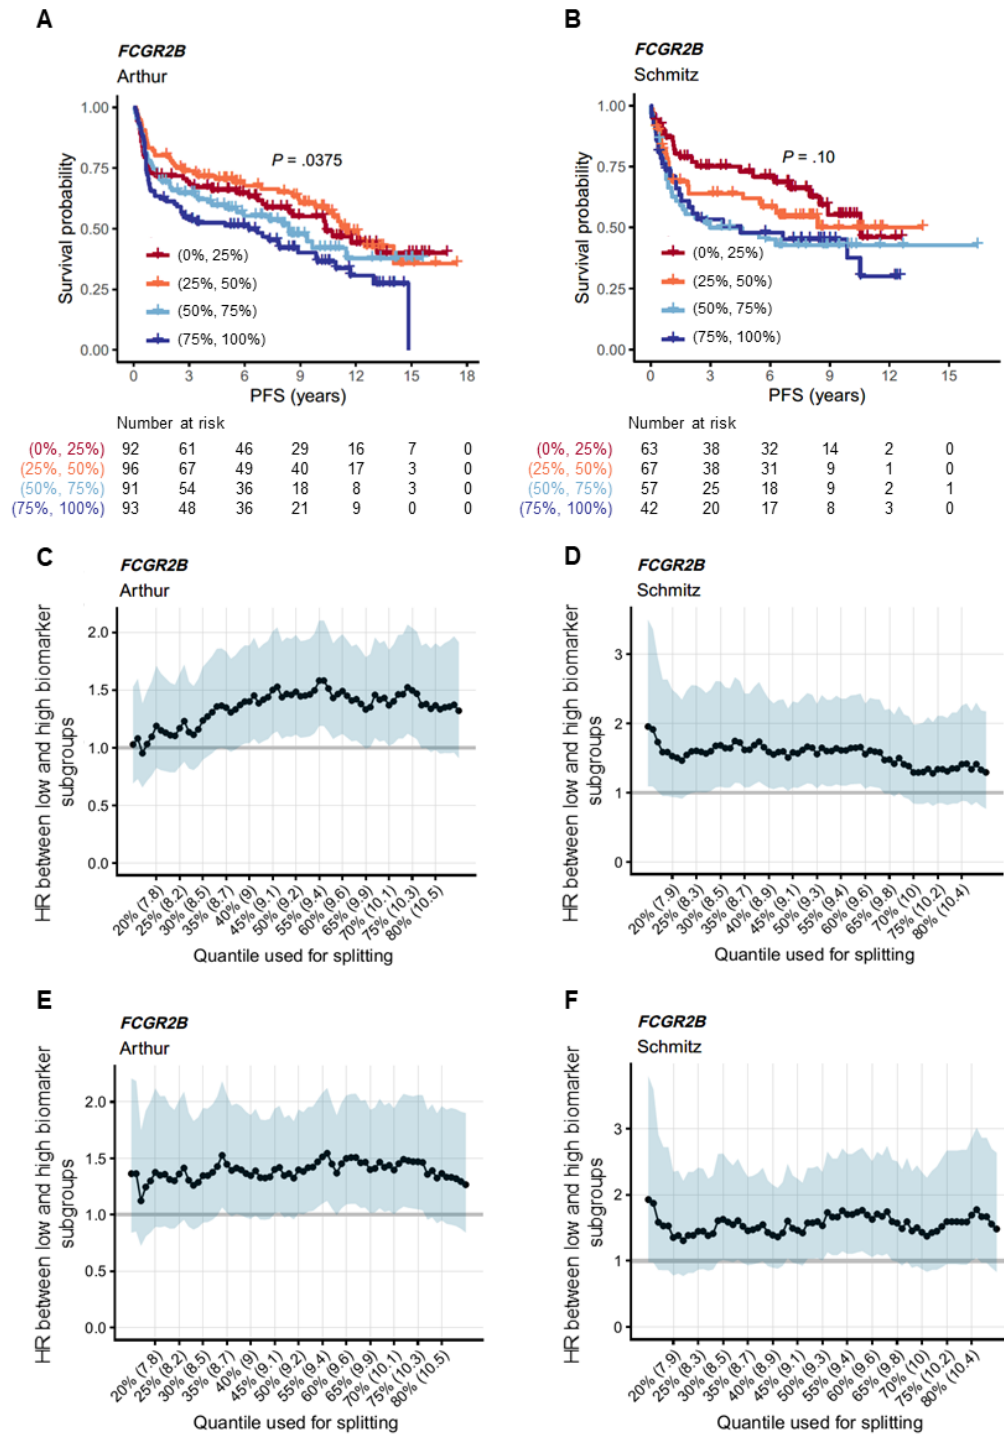

CI, confidence interval; HR, hazard ratio; PFS, progression-free survival; R-CHOP, rituximab plus cyclophosphamide, doxorubicin, vincristine and prednisone; RNA-Seq, RNA sequencing.

**Supplementary Figure 2.** Association of *FCGR2B* expression measured by RNA-Seq with OS in patients with DLBCL treated with R-CHOP in the Arthur, Schmitz and Reddy cohorts. Kaplan–Meier curves for OS based on *FCGR2B* expression according to stratification by median (A, B, C) and quartiles<sup>a</sup> (D, E, F), respectively

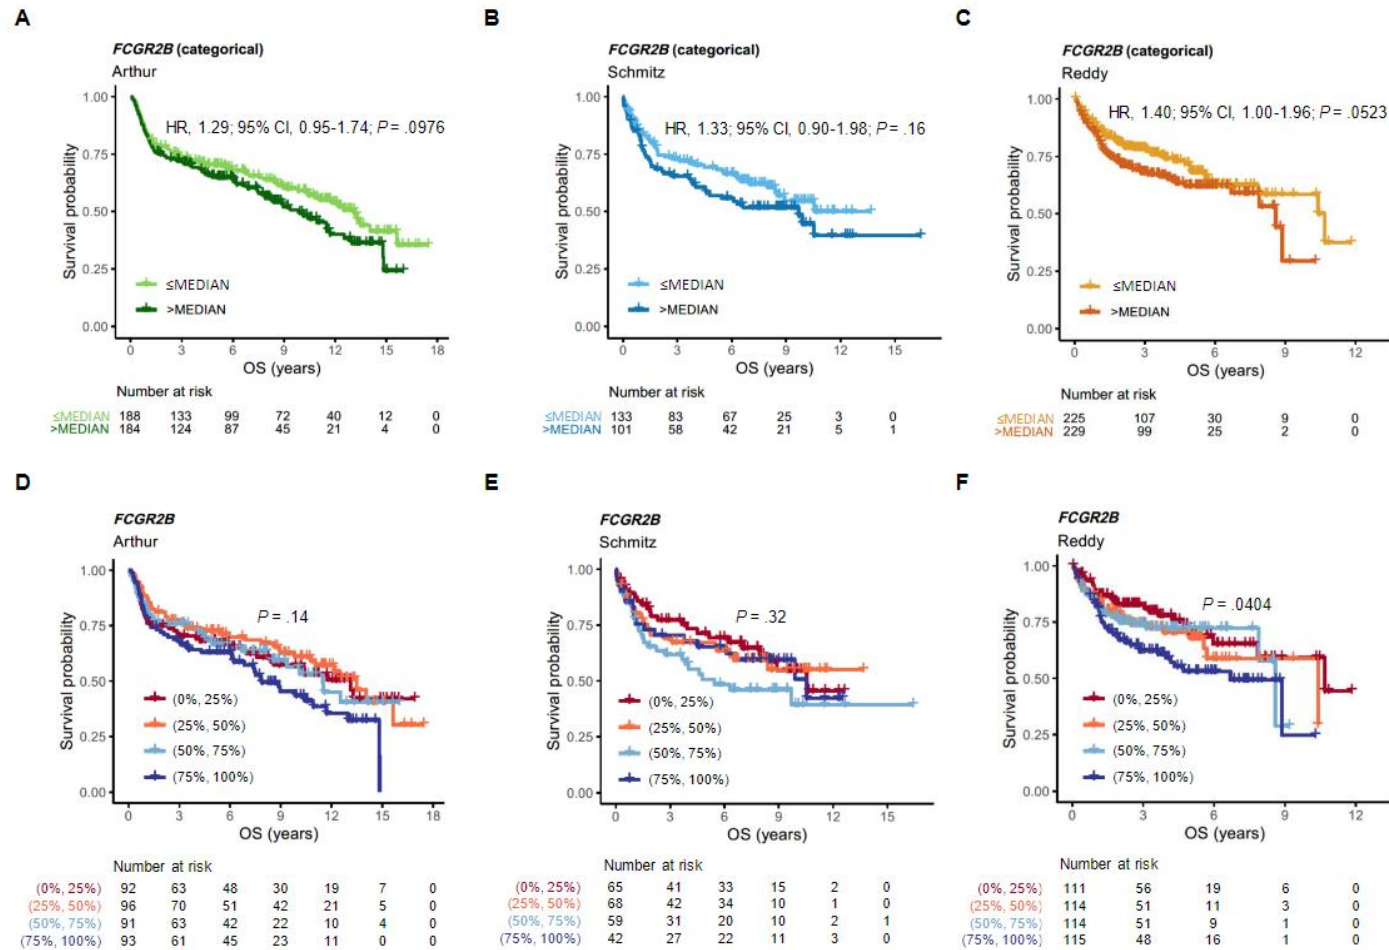

<sup>a</sup>P-values from the log-rank test.

DLBCL, diffuse large B-cell lymphoma; OS, overall survival; R-CHOP, rituximab plus cyclophosphamide, doxorubicin, vincristine and prednisone; RNA-Seq, RNA sequencing.

**Supplementary Figure 3.** Association of *FCGR2B* expression measured by NanoString with clinical outcome in patients with DLBCL treated with R-CHOP in the Arthur cohort. Kaplan-Meier curves presenting survival as defined by PFS based on *FCGR2B* expression according to stratification by quartiles<sup>a</sup> (A). Kaplan-Meier curves presenting survival as defined by OS based on *FCGR2B* expression according to stratification by median (B) and quartiles<sup>a</sup> (C)

**A**

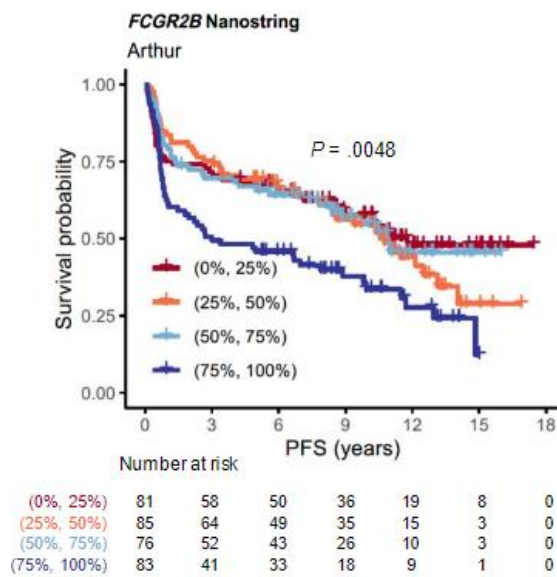

**B**

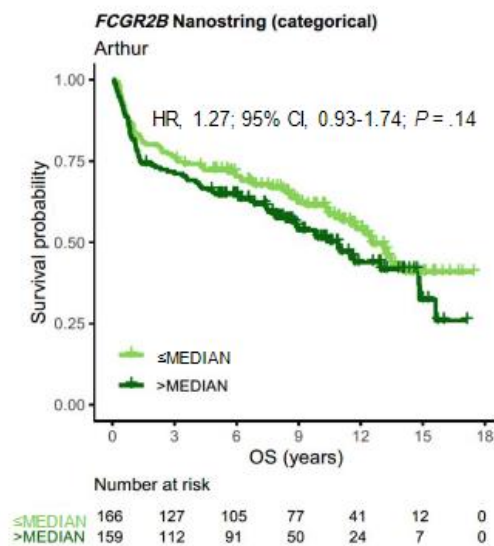

**C**

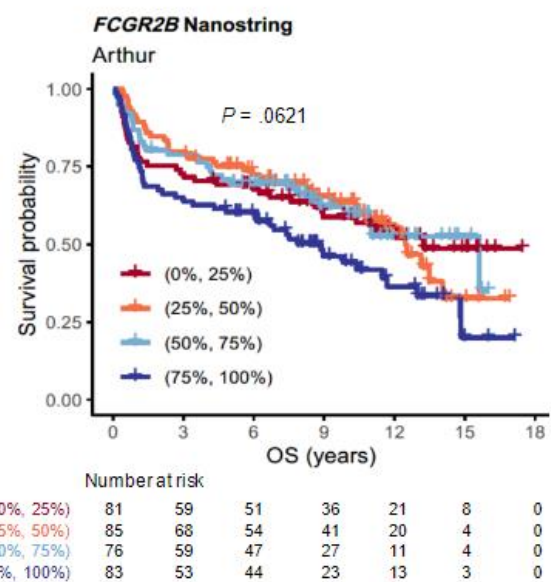

<sup>a</sup>P-values from the log-rank test.

DLBCL, diffuse large B-cell lymphoma; OS, overall survival; PFS, progression-free survival; R-CHOP, rituximab plus cyclophosphamide, doxorubicin, vincristine and prednisone.

**Supplementary Figure 4.** Prognostic effect of FcγRIIB protein expression on DLBCL tumors as measured by IHC<sup>a</sup>. Kaplan–Meier curves for OS according to high, low and negative FcγRIIB tumor expression in the Arthur cohort (A) and according to stratification by COO (B, C)

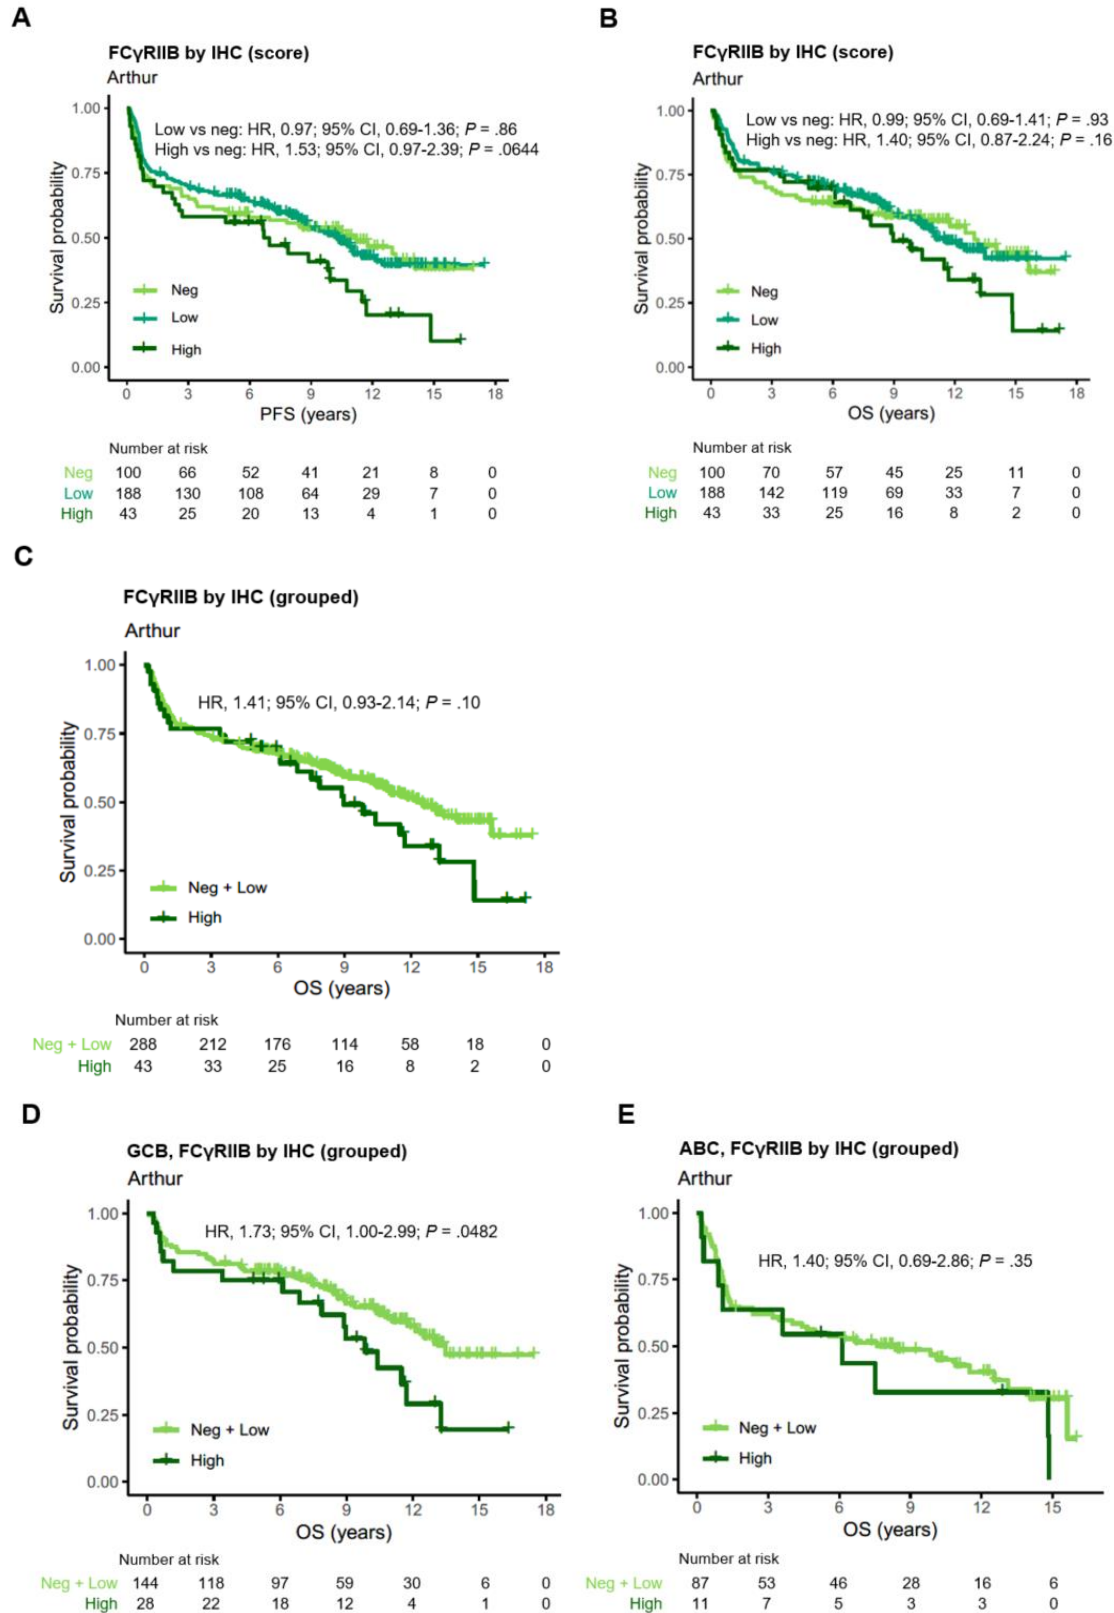

<sup>a</sup>Tumor membrane staining for FcγRIIB was defined as high (at least medium intensity staining with >50% positive cells); low (membrane positive, low intensity staining or <50% positive cells); or negative (cytoplasmic staining or negative membrane staining).

ABC, activated B cell; COO, cell of origin; DLBCL, diffuse large B-cell lymphoma; FcγRIIB, Fc gamma receptor IIB; GCB, germinal center B cell; IHC, immunohistochemistry; OS, overall survival.

**Supplementary Figure 5.** Validation of *FCGR2B* RNA-Seq measurement by qPCR in GOYA<sup>a</sup>

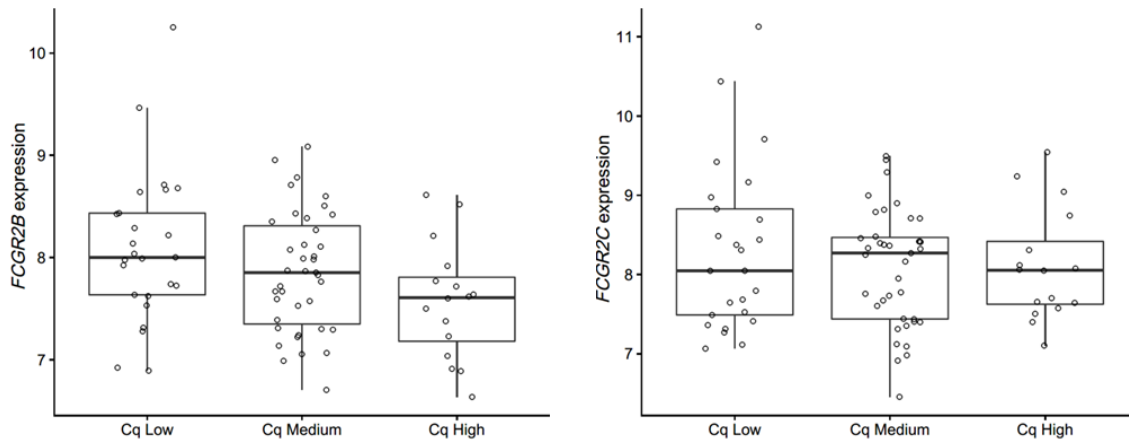

<sup>a</sup>Primers specific to *FCGR2B* and its paralog *FCGR2C* were used to quantify the expression of each gene and stratify tumors into Cq Low, Medium, or High expression. The correlation between RNA-Seq and qPCR expression was determined by a Kruskal-Wallis H test.

Cq, quantification value; qPCR, quantitative polymerase chain reaction; RNA-Seq, RNA sequencing.

**Supplementary Figure 6.** Detailed evaluation of the association between PFS and *FCGR2B* expression measured by RNA-Seq in patients with DLBCL treated with R-CHOP or G-CHOP in GOYA. Kaplan–Meier curves for PFS based on *FCGR2B* expression according to stratification by quartiles and the corresponding p-values from the log-rank test (A, B). Evaluation of the robustness of the stratification threshold used to dichotomize samples into low and high *FCGR2B* expression subgroups. Various thresholds were used, the corresponding HR between low and high *FCGR2B* expression subgroups and the corresponding 95% CIs from the univariate (C, D), and multivariate (E, F) Cox regression are plotted.

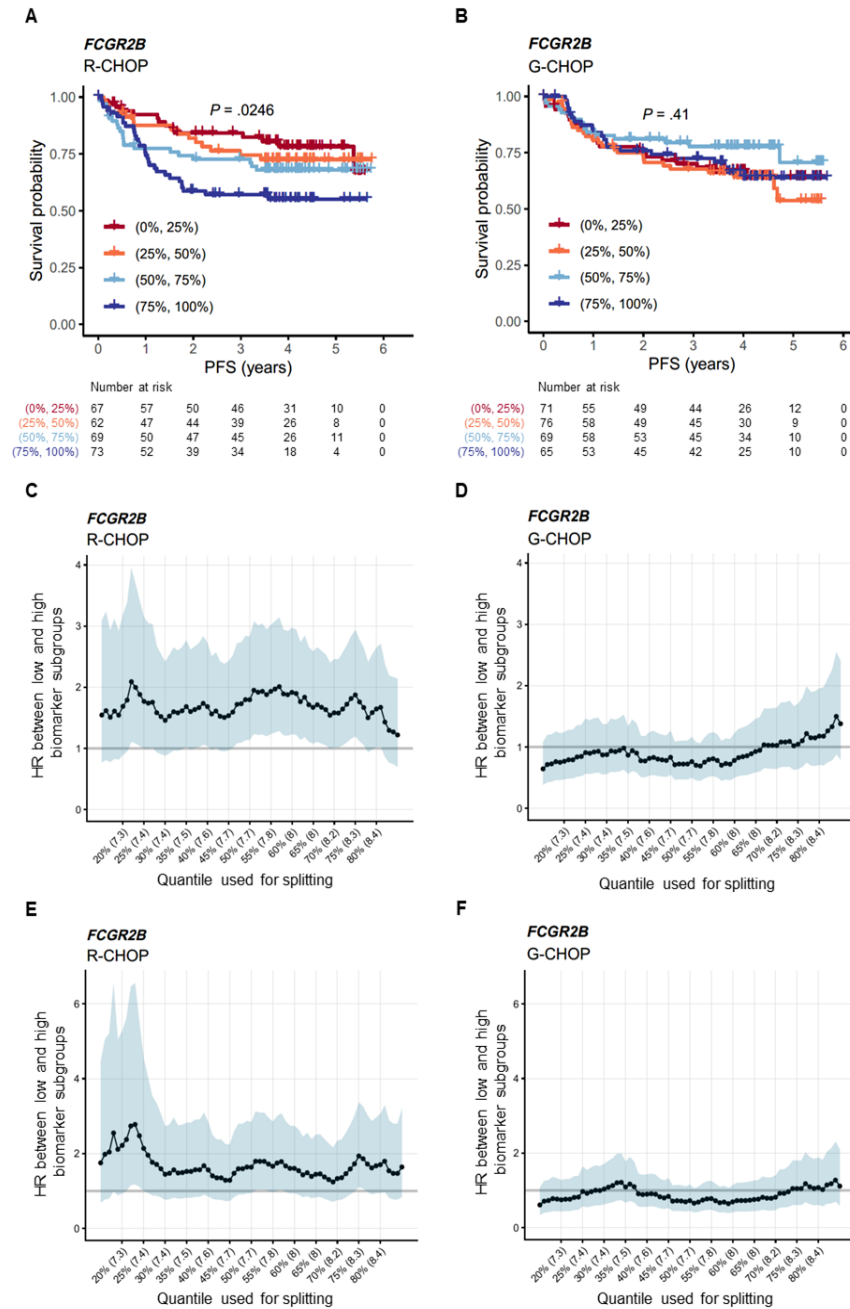

CI, confidence interval; DLBCL, diffuse large B-cell lymphoma; G-CHOP, obinutuzumab plus cyclophosphamide, doxorubicin, vincristine and prednisone; HR, hazard ratio; PFS, progression-free survival; R-CHOP, rituximab plus cyclophosphamide, doxorubicin, vincristine and prednisone; RNA-Seq, RNA sequencing.

**Supplementary Figure 7.** Association of *FCGR2B* expression by RNA-Seq with OS in patients with DLBCL treated with R-CHOP or G-CHOP in GOYA. Kaplan–Meier curves for OS based on *FCGR2B* expression according to stratification by median (A, B) and quartiles<sup>a</sup> (C, D)

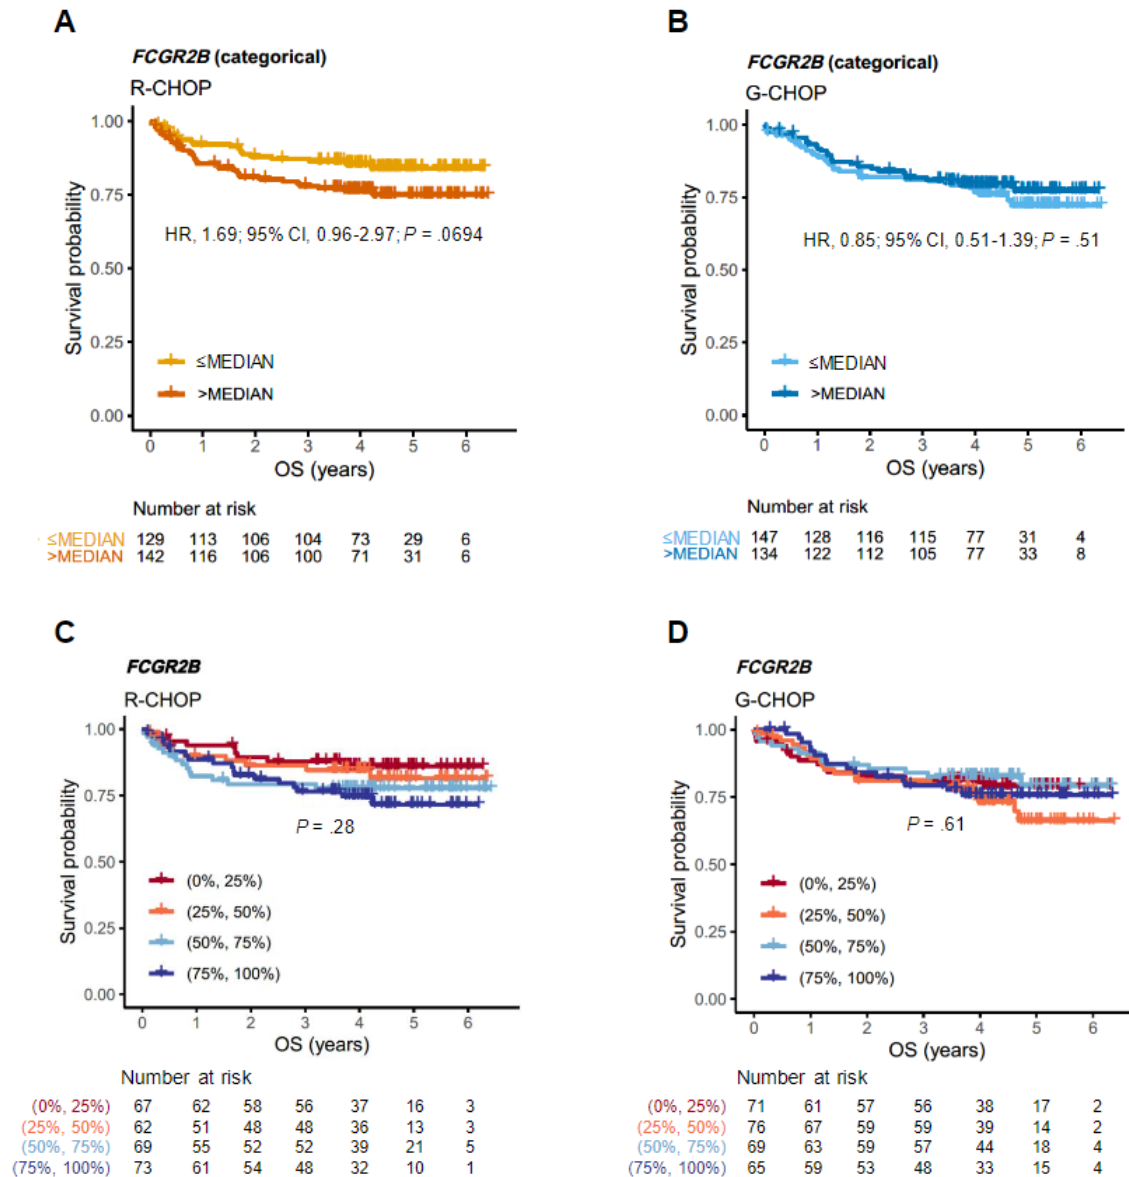

<sup>a</sup>P-values from the log-rank test.

DLBCL, diffuse large B-cell lymphoma; G-CHOP, obinutuzumab plus cyclophosphamide, doxorubicin, vincristine and prednisone; OS, overall survival; R-CHOP, rituximab plus cyclophosphamide, doxorubicin, vincristine and prednisone; RNA-Seq, RNA sequencing.

**Supplementary Figure 8.** Prognostic effect of FcγRIIB protein expression on DLBCL tumors and macrophages in GOYA as measured by IHC<sup>a</sup>. Kaplan–Meier curves for OS according to positive and negative FcγRIIB protein expression on DLBCL tumors (A), and according to high, or low/negative expression on macrophages (B)

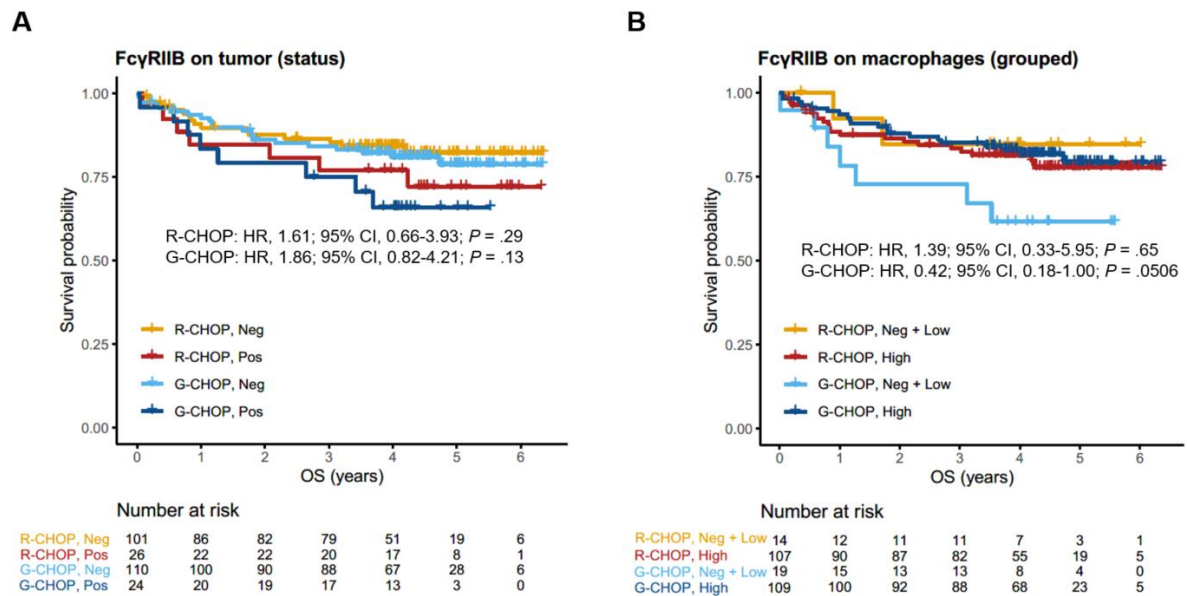

<sup>a</sup>Tumors were assessed as negative or positive for FcγRIIB membrane staining. FcγRIIB on macrophages was defined as high (at least medium intensity staining with >50% positive cells); low (membrane positive, low intensity staining or <50% positive cells); or negative (cytoplasmic staining or membrane negative).

DLBCL, diffuse large B-cell lymphoma; FcγRIIB, Fc gamma receptor IIB; IHC, immunohistochemistry; OS, overall survival.
